# Supplementary material for: Lichen sclerosus: The 2023 update
Source: PubMed Central journal article supplement (PMC9978401; doi:10.3389/fmed.2023.1106318), 2023-02-16
Supplement: Table_1.pdf [file Table_1.pdf]

**Supplementary Table 1 - Level of evidence and grade of recommendation**  
**(Evaluation of articles according to GRADE: [www.gradeworkinggroup.org](http://www.gradeworkinggroup.org))**

| <b>Level of evidence</b>       | <b>Type of evidence</b>                                                                                                                                                                                                                                                                                                        |
|--------------------------------|--------------------------------------------------------------------------------------------------------------------------------------------------------------------------------------------------------------------------------------------------------------------------------------------------------------------------------|
| 1++                            | High-quality meta-analyses, systematic reviews of RCTs, <b>or</b> RCTs with a very low risk of bias                                                                                                                                                                                                                            |
| 1+                             | Well-conducted meta-analyses, systematic reviews of RCTs, <b>or</b> RCTs with a low risk of bias                                                                                                                                                                                                                               |
| 1-                             | Meta-analyses, systematic reviews of RCTs, <b>or</b> RCTs with a high risk of bias *                                                                                                                                                                                                                                           |
| 2++                            | High-quality systematic reviews of case-control or cohort studies <b>or</b> high-quality case-control or cohort studies with a very low risk of confounding, bias or chance and a high probability that the relationship is causal                                                                                             |
| 2+                             | Well-conducted case-control or cohort studies with a low risk of confounding, bias or chance and a moderate probability that the relationship is causal                                                                                                                                                                        |
| 2-                             | Case-control or cohort studies with a high risk of confounding, bias or chance and a significant risk that the relationship is not causal *                                                                                                                                                                                    |
| 3                              | Non-analytical studies (for example, case reports, case series)                                                                                                                                                                                                                                                                |
| 4                              | Expert opinion, formal consensus                                                                                                                                                                                                                                                                                               |
| <b>Grade of recommendation</b> | <b>Evidence</b>                                                                                                                                                                                                                                                                                                                |
| A                              | At least one meta-analysis, systematic review, or RCT rated as 1++, and directly applicable to the target population, <b>or</b> a systematic review of RCTs or a body of evidence consisting principally of studies rated as 1+, directly applicable to the target population and demonstrating overall consistency of results |
| B                              | A body of evidence including studies rated as 2++, directly applicable to the target population and demonstrating overall consistency of results, <b>or</b> extrapolated evidence from studies rated as 1++ or 1+                                                                                                              |
| C                              | A body of evidence including studies rated as 2+ , directly applicable to the target population and demonstrating overall consistency of results, <b>or</b> extrapolated evidence from studies rated as 2++                                                                                                                    |

|         |                                                                                                                              |
|---------|------------------------------------------------------------------------------------------------------------------------------|
| D       | Evidence level 3 or 4, <b>or</b> extrapolated evidence from studies rated as 2+ , <b>or</b> formal consensus                 |
| D (GPP) | A good practice point (GPP) is a recommendation for best practice based on the experience of the guideline development group |

\* Studies with a level of evidence ‘-’ should not be used as a basis for making a recommendation RCT, randomized controlled trial.
